# Supplementary material for: Unraveling the Dysbiosis of Vaginal Microbiome to Understand Cervical Cancer Disease Etiology—An Explainable AI Approach
Source: MDPI journal article supplement (doi:10.3390/genes14040936), 2023-04-18
Supplement: s1 [file s1]

## Result Summary: Code with Outputs

```
# evaluate a random forest model using repeated k-fold cross-validation
from numpy import mean
from numpy import std
from sklearn.datasets import make_classification
from sklearn.model_selection import RepeatedKFold, cross_validate
from sklearn.model_selection import cross_val_score
from sklearn.linear_model import LogisticRegression
from sklearn.ensemble import RandomForestClassifier
# create dataset
import pandas
data = pandas.read_csv("cervical-modeling.csv")

X = data.iloc[:, :-1]
y = data.iloc[:, -1]

from sklearn import preprocessing
cv = RepeatedKFold(n_splits=10, n_repeats=5, random_state=1)
# create model
fr = RandomForestClassifier()
# evaluate model
#scores = cross_val_score(fr, X, y, scoring='accuracy', cv=cv, n_jobs=-1)
scores = cross_validate(fr, X, y, scoring='accuracy', cv=cv,
return_estimator=True )
# report performance
scores
```

Output:

```
{'fit_time': array([0.17345953, 0.30371141, 0.1110363 , 0.09734368,
0.17350817,
    0.18749547, 0.15978193, 0.14586473, 0.15343857, 0.13212061,
    0.12495637, 0.12490106, 0.17328167, 0.1736238 , 0.11151195,
    0.12519979, 0.09729004, 0.10423589, 0.10427928, 0.10406303,
    0.10431886, 0.0976243 , 0.09720755, 0.18046546, 0.15983033,
    0.17378521, 0.15276527, 0.13907123, 0.13893175, 0.13902807,
    0.13864064, 0.15291071, 0.16179061, 0.14871764, 0.15010834,
    0.15442991, 0.15718937, 0.13781261, 0.14408517, 0.14207697,
    0.15301275, 0.15224051, 0.14404821, 0.21784496, 0.2705338 ,
    0.27771688, 0.25702167, 0.25691867, 0.24995995, 0.2570014 ]),
'score_time': array([0.01563358, 0.01394057, 0.01391459, 0.00683832,
0.02091599,
    0.0139792 , 0.02072573, 0.01397491, 0.02056003, 0.01405406,
    0.02076554, 0.01404166, 0.02789807, 0.01396799, 0.0135138 ,
    0.01396871, 0.0136528 , 0.00686097, 0.00704408, 0.01374578,
    0.00689292, 0.00692248, 0.0140624 , 0.02765703, 0.01365042,
    0.0207386 , 0.01382923, 0.0139389 , 0.013762 , 0.01392341,
    0.01411128, 0.01375031, 0.01352429, 0.01962209, 0.01442814,
    0.01444411, 0.01437926, 0.01352572, 0.01433611, 0.01634073,
    0.01633072, 0.0147953 , 0.01535606, 0.02811646, 0.02782512,
    0.02777004, 0.0276885 , 0.02783275, 0.02773595, 0.02085686]),
'estimator': [RandomForestClassifier(),
RandomForestClassifier(),
RandomForestClassifier(),
RandomForestClassifier(),
RandomForestClassifier(),
RandomForestClassifier(),
RandomForestClassifier(),
RandomForestClassifier(), RandomForestClassifier(),
RandomForestClassifier()]
```



```

# evaluate a random forest model using k-fold cross-validation
from numpy import mean
from numpy import std
from sklearn.datasets import make_classification
from sklearn.model_selection import RepeatedKFold
from sklearn.model_selection import cross_val_score
from sklearn.linear_model import LogisticRegression
from sklearn.ensemble import RandomForestClassifier
# create dataset
import pandas
data = pandas.read_csv("cervical-modeling.csv")
from sklearn.model_selection import KFold
X = data.iloc[:, :-1]
y = data.iloc[:, -1]

from sklearn import preprocessing
cv = KFold(n_splits=10, random_state=None)
# create model
model = RandomForestClassifier()
# evaluate model
scores = cross_val_score(model, X, y, scoring='accuracy', cv=cv, n_jobs=-1)
# report performance
print('Accuracy: %.3f (%.3f)' % (mean(scores), std(scores)))

```

**Accuracy: 0.962 (0.092)**
